# Supplementary material for: An inorganic anionic polymer filter disc: direct crystallization of a layered silicate nanosheet on a glass fiber filter
Source: Royal Society of Chemistry journal article supplement (doi:10.1039/c5ra25626g), 2016-01-01
Supplement: c5ra25626g1.pdf [file c5ra25626g1.pdf]

# ***Electronic Supplementary Information***

**An Inorganic Anionic Polymer Filter Disc:  
Direct Crystallization of a Layered Silicate Nanosheet on  
a Glass Fiber Filter**

**by**

***Tomohiko Okada,<sup>†\*</sup> Kei Shimizu,<sup>†</sup>  
and Tomohiko Yamakami<sup>§</sup>***

<sup>†</sup> Department of Chemistry and Material Engineering, Faculty of Engineering,  
Shinshu University, Wakasato 4-17-1, Nagano 380-8553, Japan  
<sup>§</sup> Technology Division, Shinshu University, Wakasato 4-17-1, Nagano 380-8553,  
Japan

\* E-mail: [tomohiko@shinshu-u.ac.jp](mailto:tomohiko@shinshu-u.ac.jp)

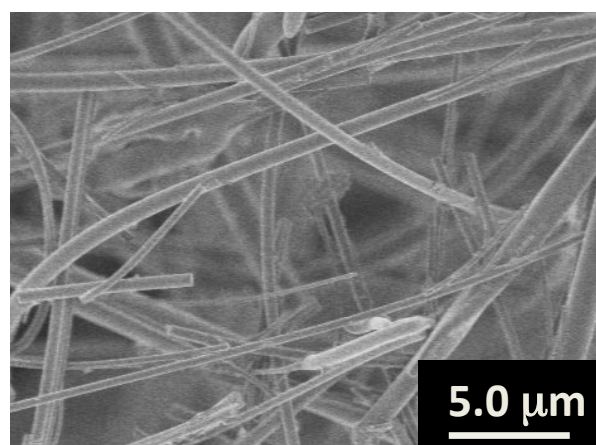

**Fig. S1.** SEM image of the pristine silica fibers (ADVANTEC GB-100R).

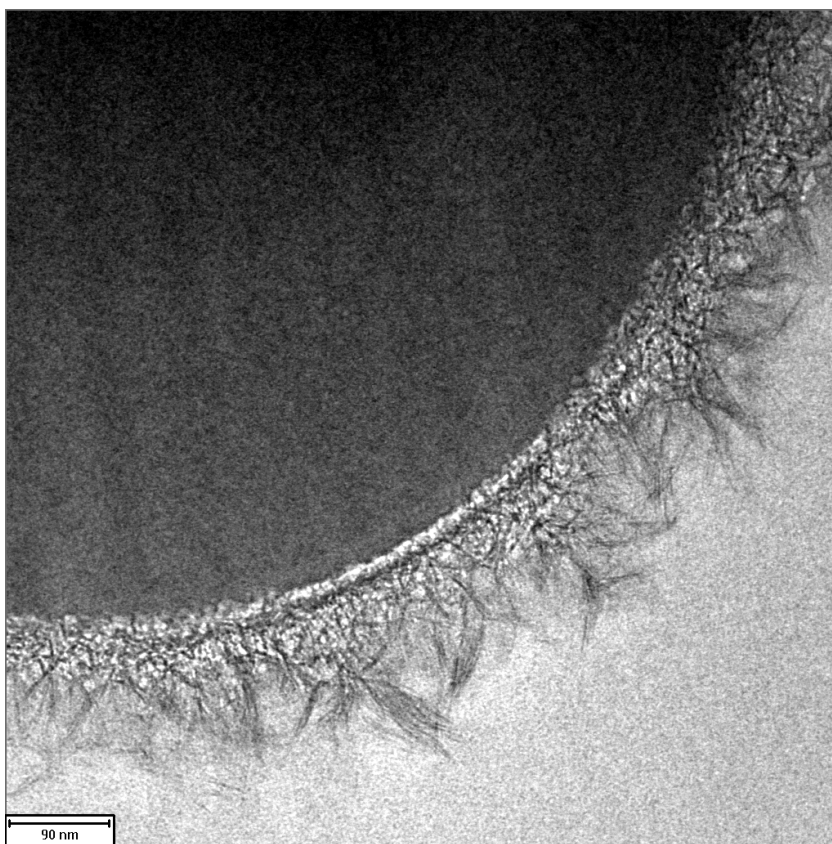

**Fig. S2.** A cross-sectional TEM image of F15q.

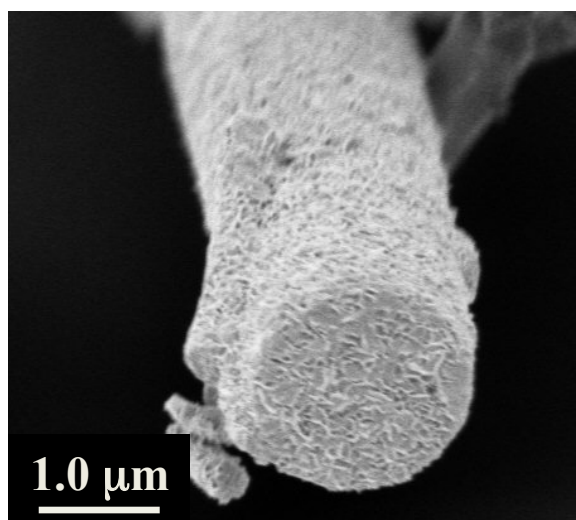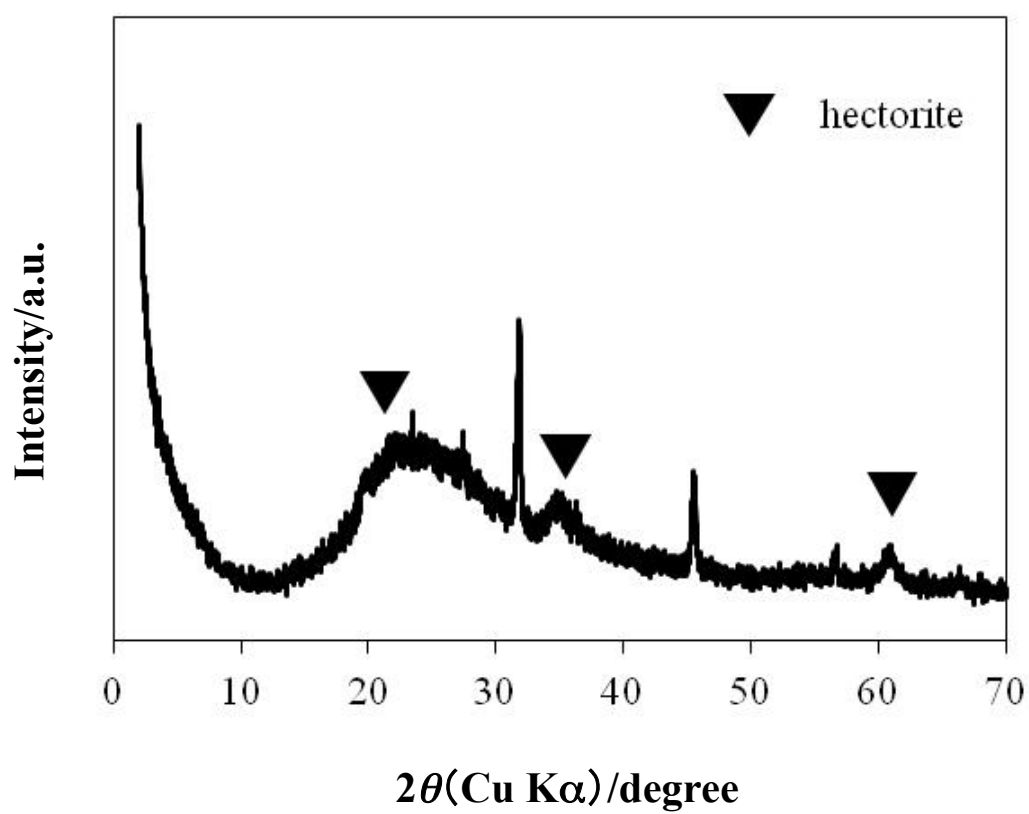

Fig. S3. (bottom) XRD pattern and (top) SEM image of the F15h fibers .

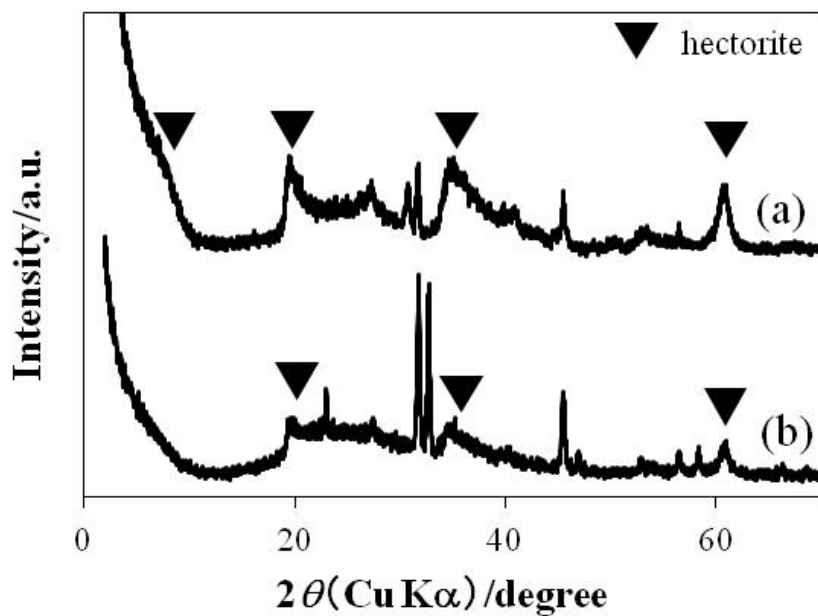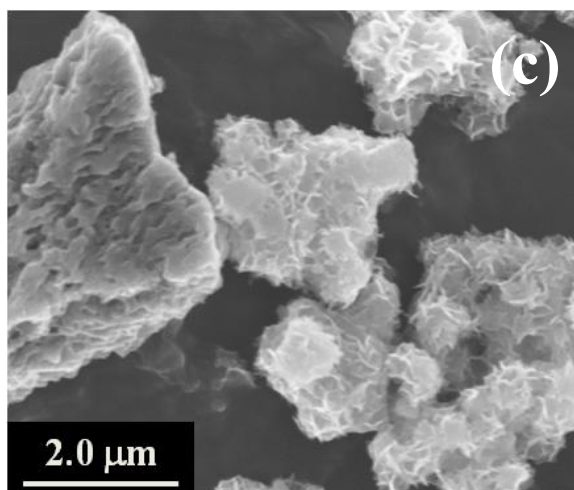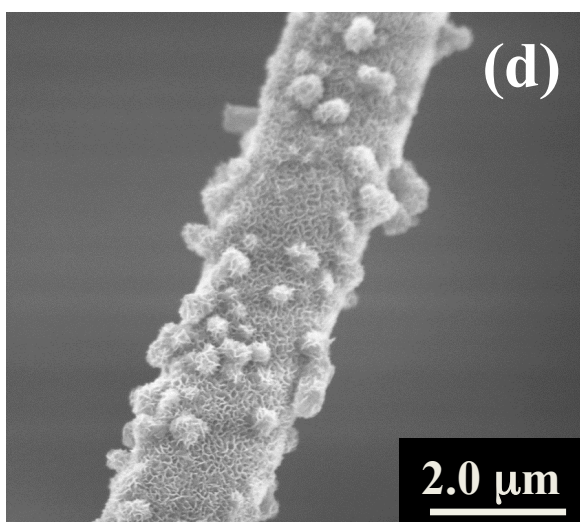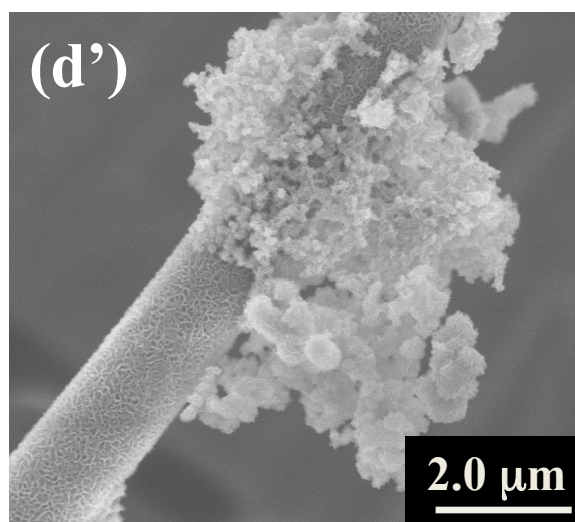

**Fig. S4.** XRD patterns of (a) particles, which precipitated during the F50h synthesis, and (b) fibers in the filter part. SEM images of (c) the precipitates, and (d) the fiber part.

< F50e >

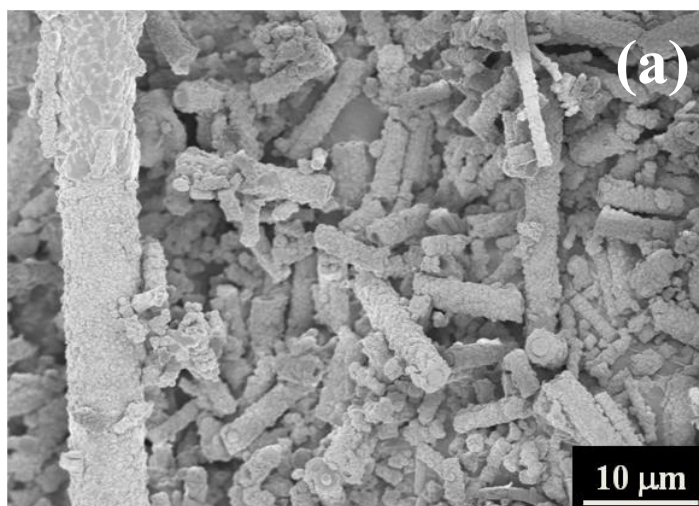

< F15e >

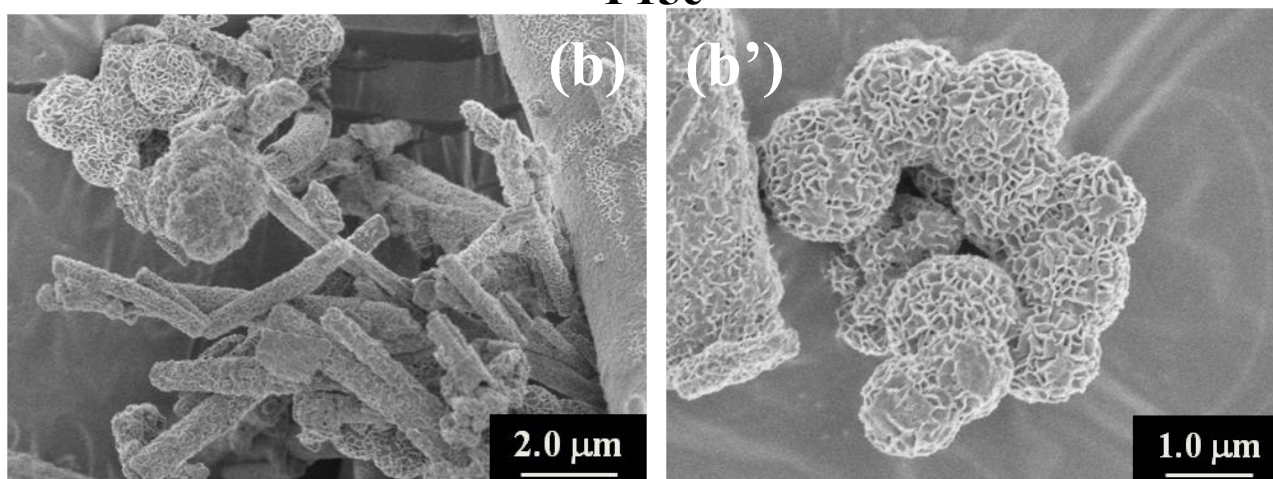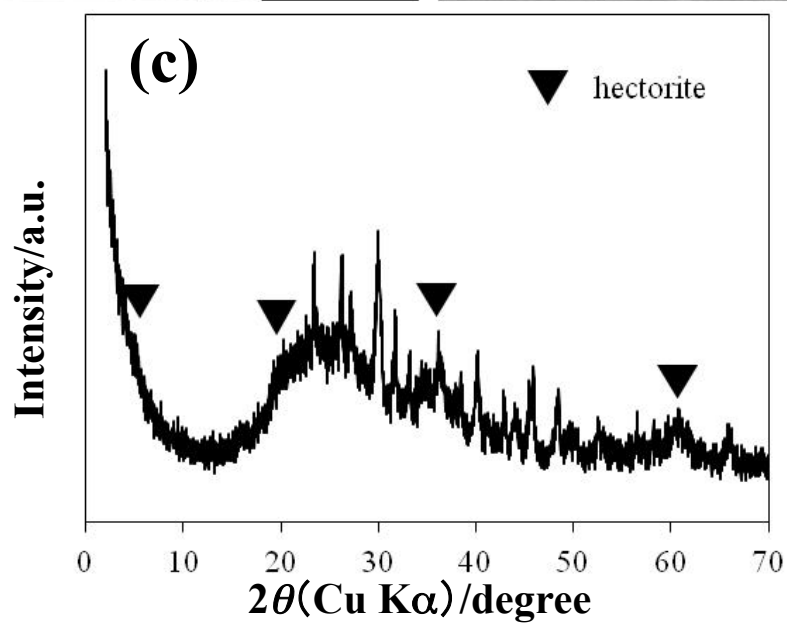

**Fig. S5.** SEM images of fragments, which precipitated during the (a) F50e and (b) F15e syntheses, and (c) the XRD pattern of the precipitate in F15e synthesis.

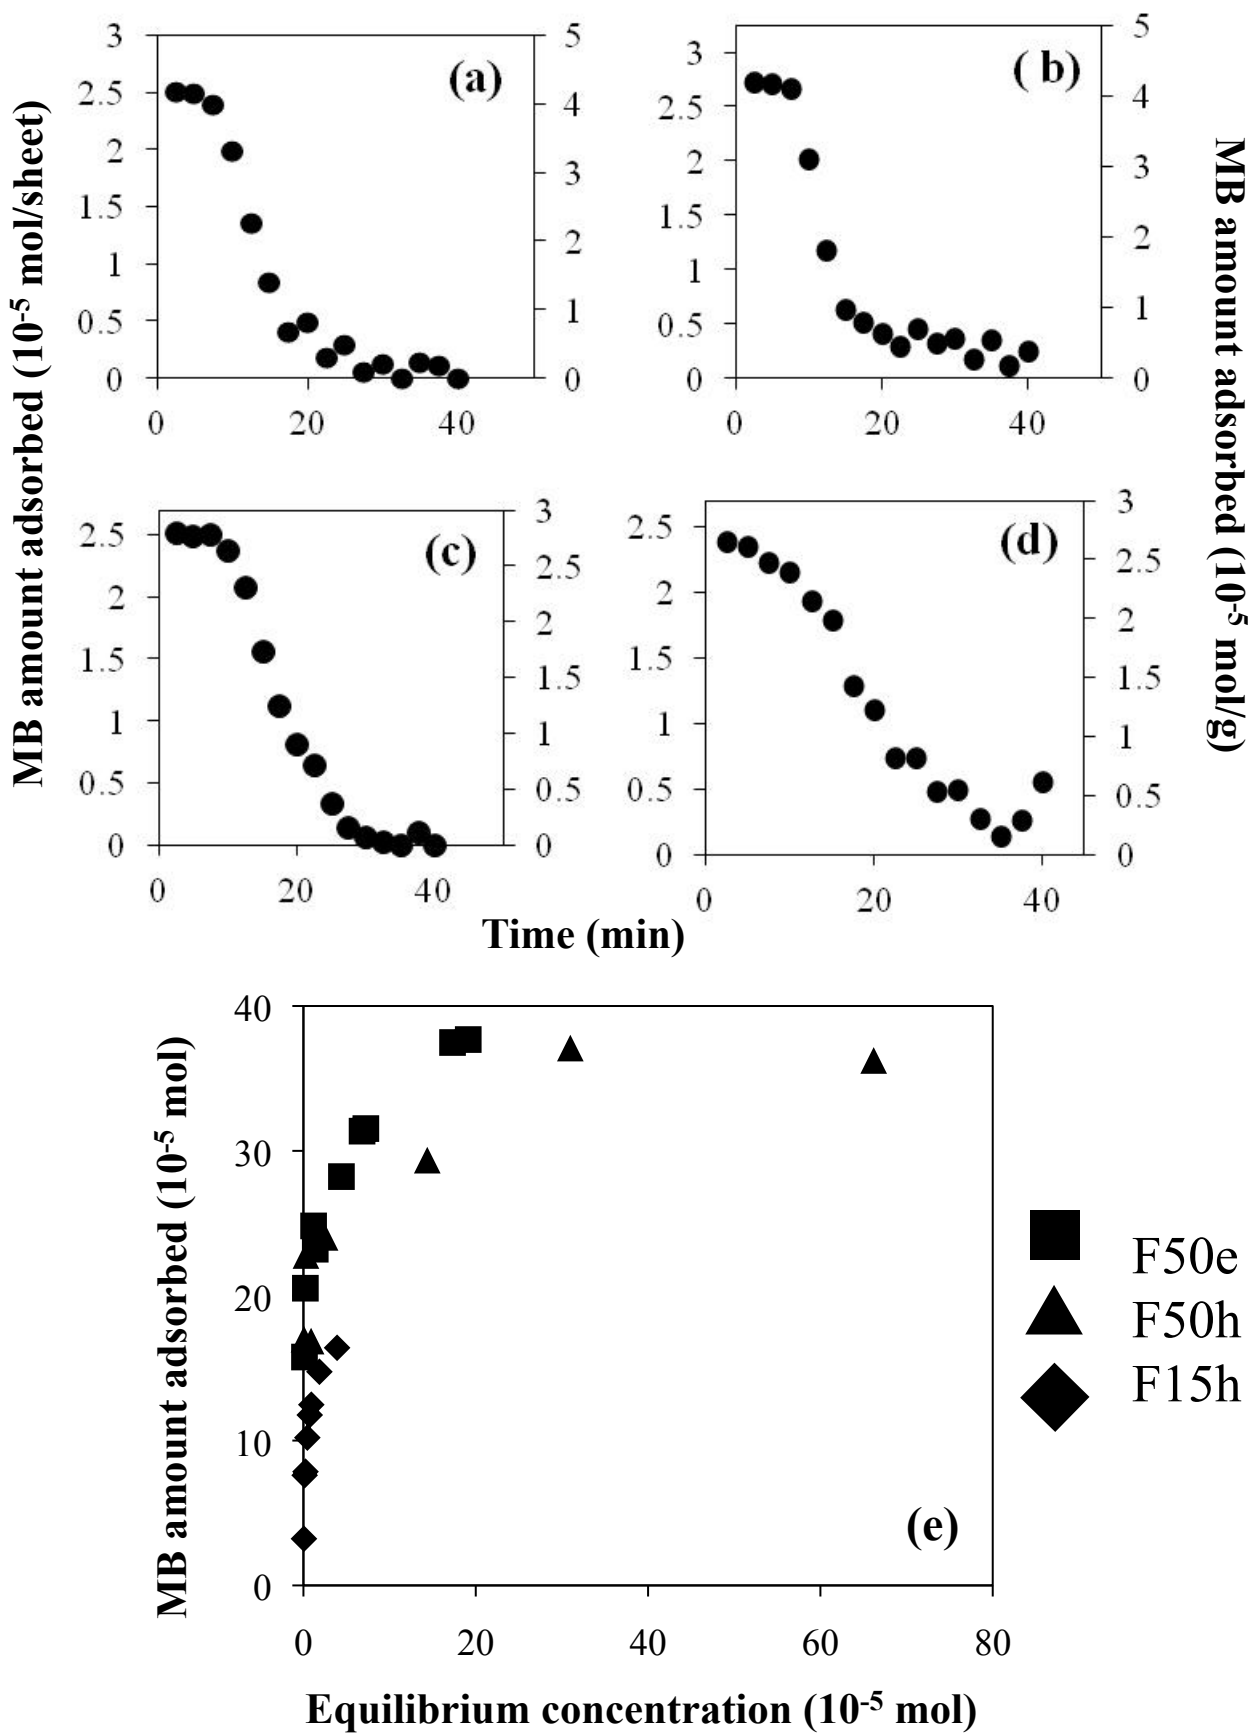

**Fig. S6.** MB breakthrough curves of (a) F15e, (b) F15h, (c) F50e, (d) F50h, and (e) the adsorption isotherms of MB from aqueous solution on the Hect-coated fiber samples.



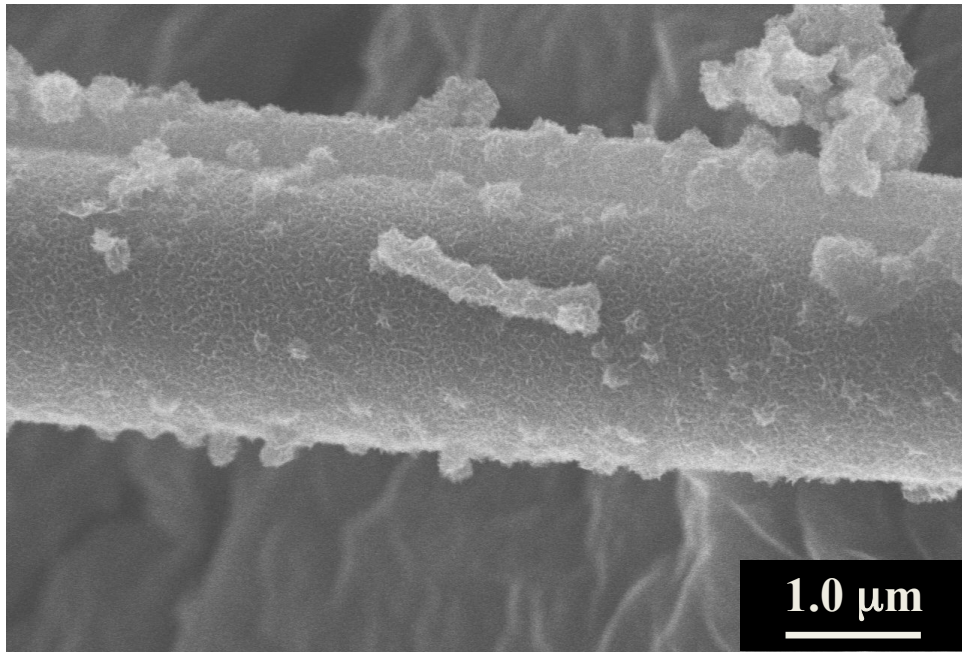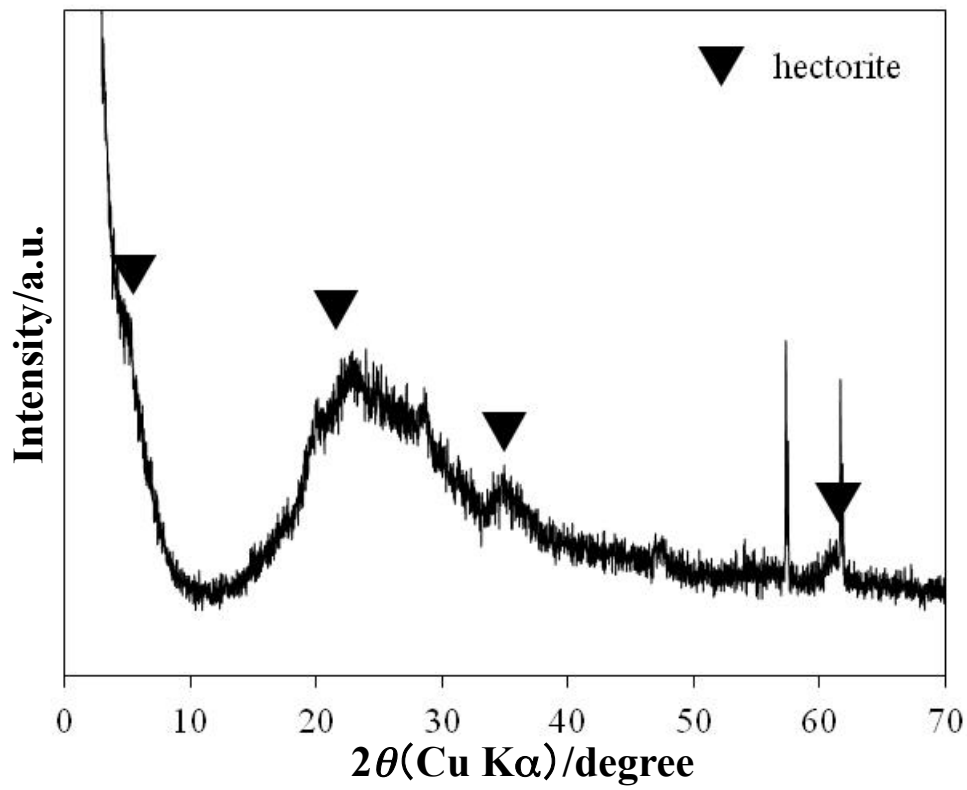

**Fig. S7.** (bottom) XRD pattern and (top) SEM image of the FDq fibers.
